# Supplementary material
Source: PubMed Central journal article supplement (PMC3676175)
Supplement: NIHMS410084-supplement-1.pdf [file NIHMS410084-supplement-1.pdf]

## **Sustained *Hox5* Gene Activity is Required for Respiratory Motor Neuron Development**

Polyxeni Philippidou<sup>1</sup>, Carolyn Walsh<sup>1</sup>, Josée Aubin<sup>2</sup>, Lucie Jeannotte<sup>2</sup>, Jeremy S. Dasen<sup>1</sup>

<sup>1</sup> Howard Hughes Medical Institute, NYU School of Medicine, Smilow Neuroscience Program  
Department of Physiology and Neuroscience, New York, NY

<sup>2</sup> Centre de recherche en cancérologie de l'Université Laval, CRCHUQ, L'Hôtel-Dieu de  
Québec, Canada

## Supplementary Information

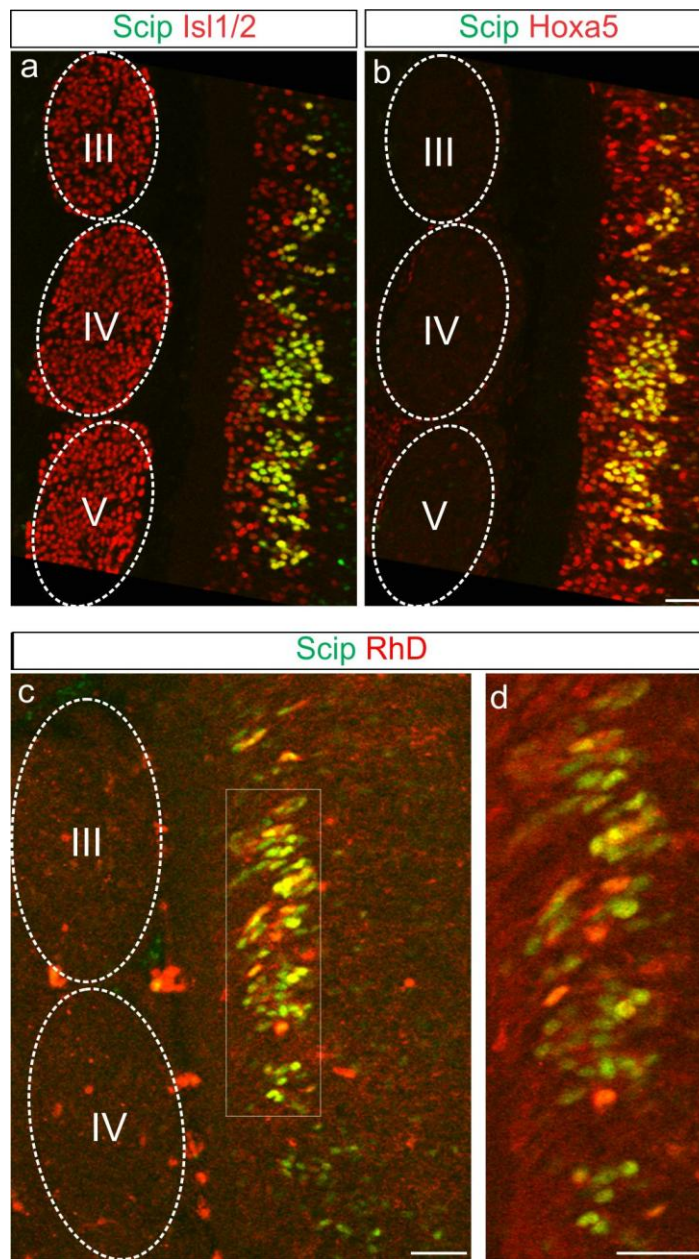

### Supplementary Figure 1. Rostrocaudal extent of PMC position.

(a-b) Scip expression in longitudinal spinal cord sections at e12.5. Scip+ motor neurons are located in segments III-V, within the domain of Hox5 expression. Scale bar=50 $\mu$ m.

(c-d) Retrograde labeling of Scip+ motor neurons after RhD injection into the phrenic nerve at e12.5. Scale bar=50 $\mu$ m.

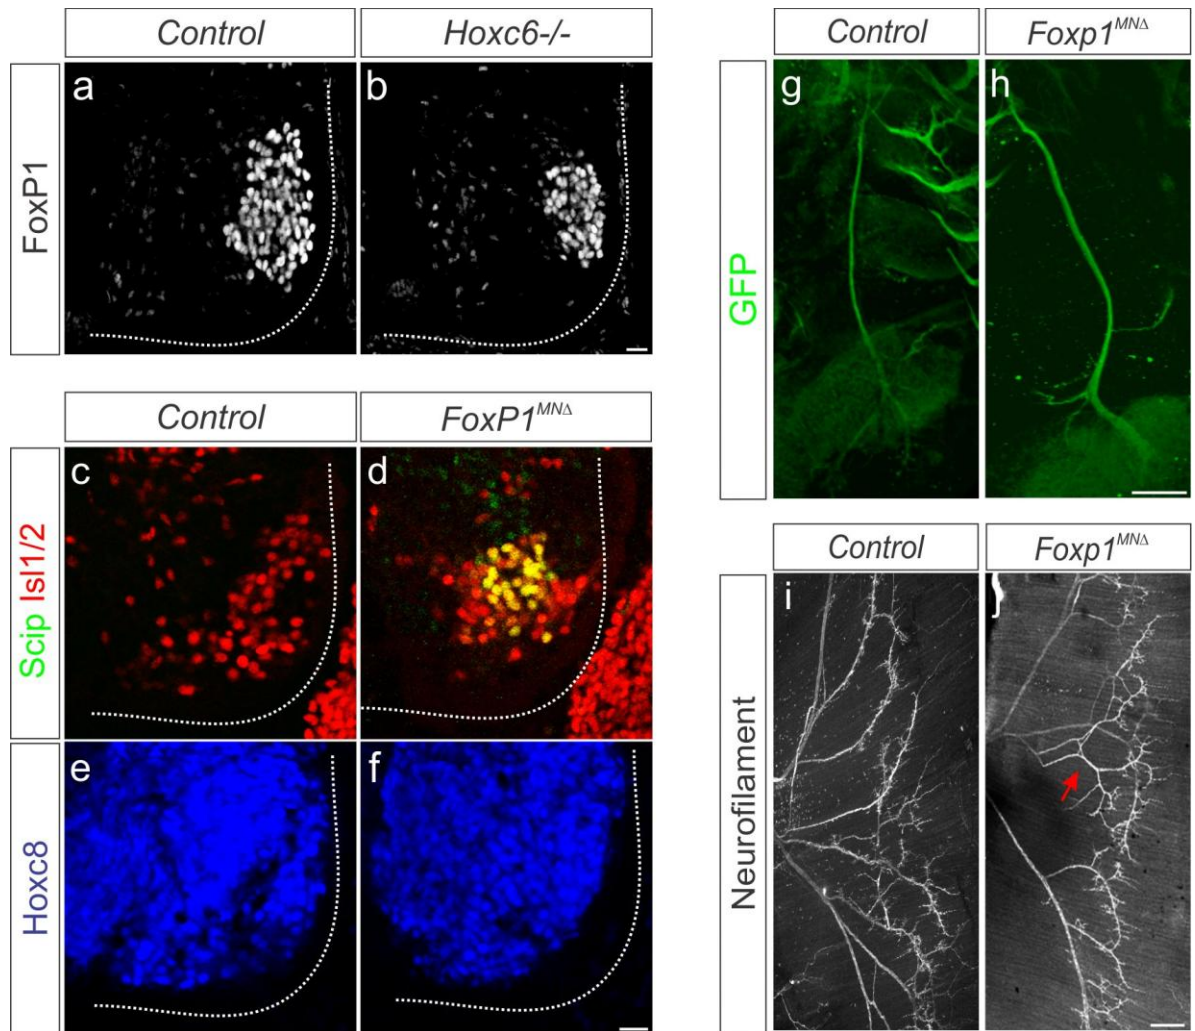

**Supplementary Figure 2. Hox and FoxP1 activities define PMC size and position.**

(a-b) Reduction of FoxP1 expression at cervical levels in *Hoxc6*<sup>-/-</sup> mice.

(c-f) Ectopic Scip expression in the Hoxc8+ domain in *Foxp1*<sup>MNA</sup> mice.

(g-h) The thickness of the phrenic nerve is increased in *Foxp1*<sup>MNA</sup> mice. Phrenic nerves were visualized by wholemount GFP staining in an *Hb9::GFP* background.

(i-j) Diaphragm innervation is grossly normal in *Foxp1*<sup>MNA</sup> mice, with the exception of some overlapping branches (arrow in j).

Scale bars=25μm (a-f), 100μm (g-j).

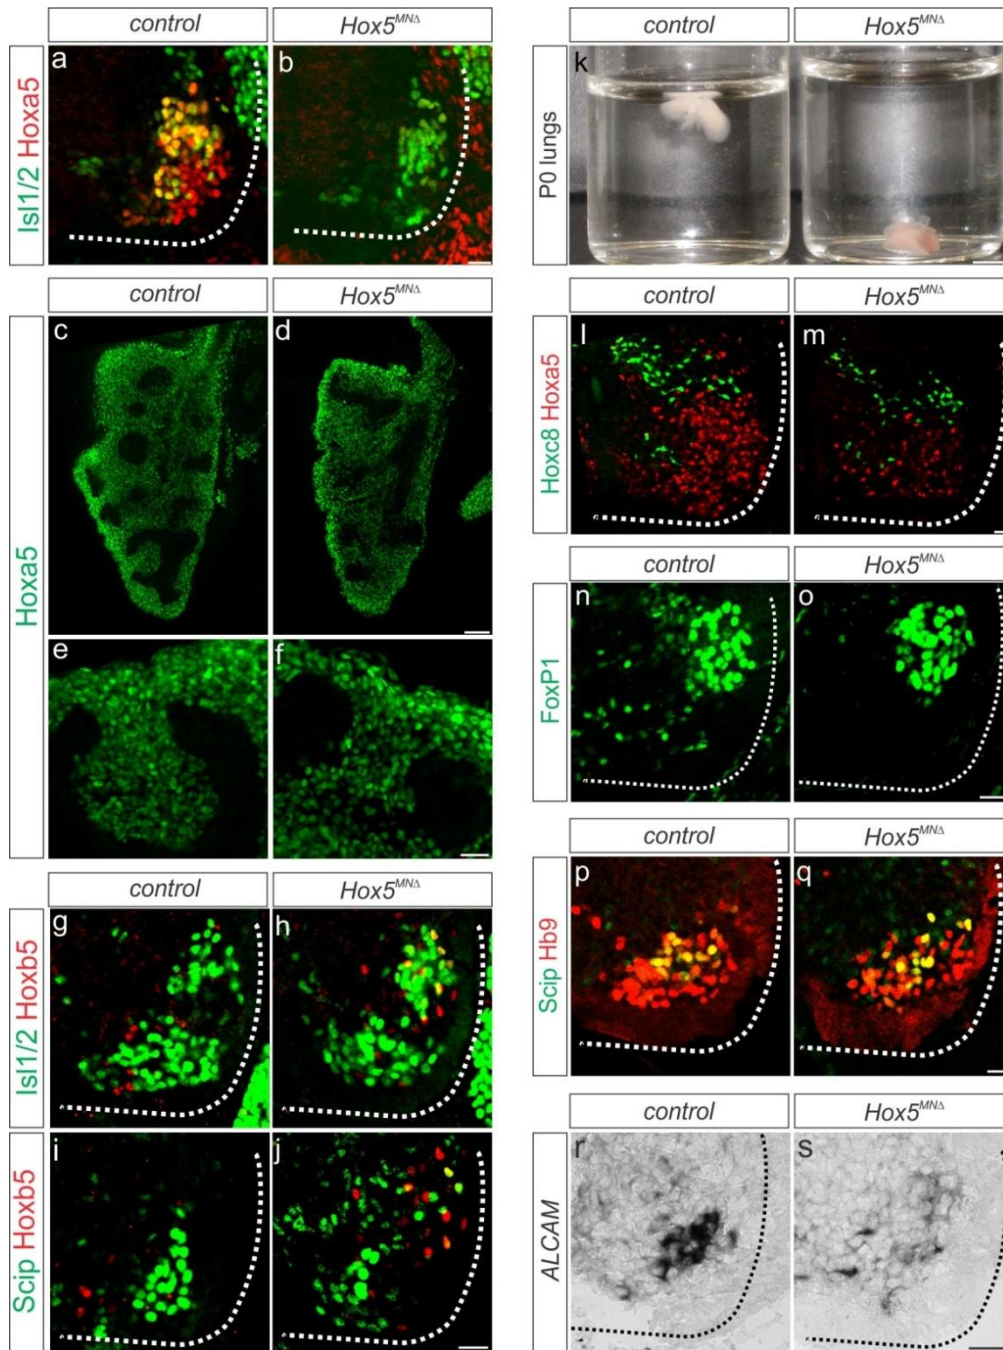

### Supplementary Figure 3. Analysis of *Hox5*<sup>MNA</sup> mice.

(a-b) *Hoxa5* expression is lost in motor neurons at e11.5 in *Hox5*<sup>MNA</sup> mice. (c-f) *Hoxa5* expression is maintained in cells of the lung at e12.5 in *Hox5*<sup>MNA</sup> mice. (g-j) *Hoxb5* is upregulated in a few *Isl1/2*+ cells in *Hox5*<sup>MNA</sup> mice, however they are *Scip*-. (k) Lungs of *Hox5*<sup>MNA</sup> newborn pups sink in water, indicating they are not inflated with air. (l-m) *Hoxc8* expression does not expand rostrally in *Hox5*<sup>MNA</sup> mice at e12.5. (n-o) *FoxP1* expression is not affected in *Hox5*<sup>MNA</sup> mice at e13.5. (p-q) *Hb9* expression is similar between control and *Hox5*<sup>MNA</sup> mice at e12.5. (r-s) *ALCAM* expression is reduced in *Hox5*<sup>MNA</sup> mice at e13.5. Scale bars=25µm, except in c,d=100µm and k=500µm.



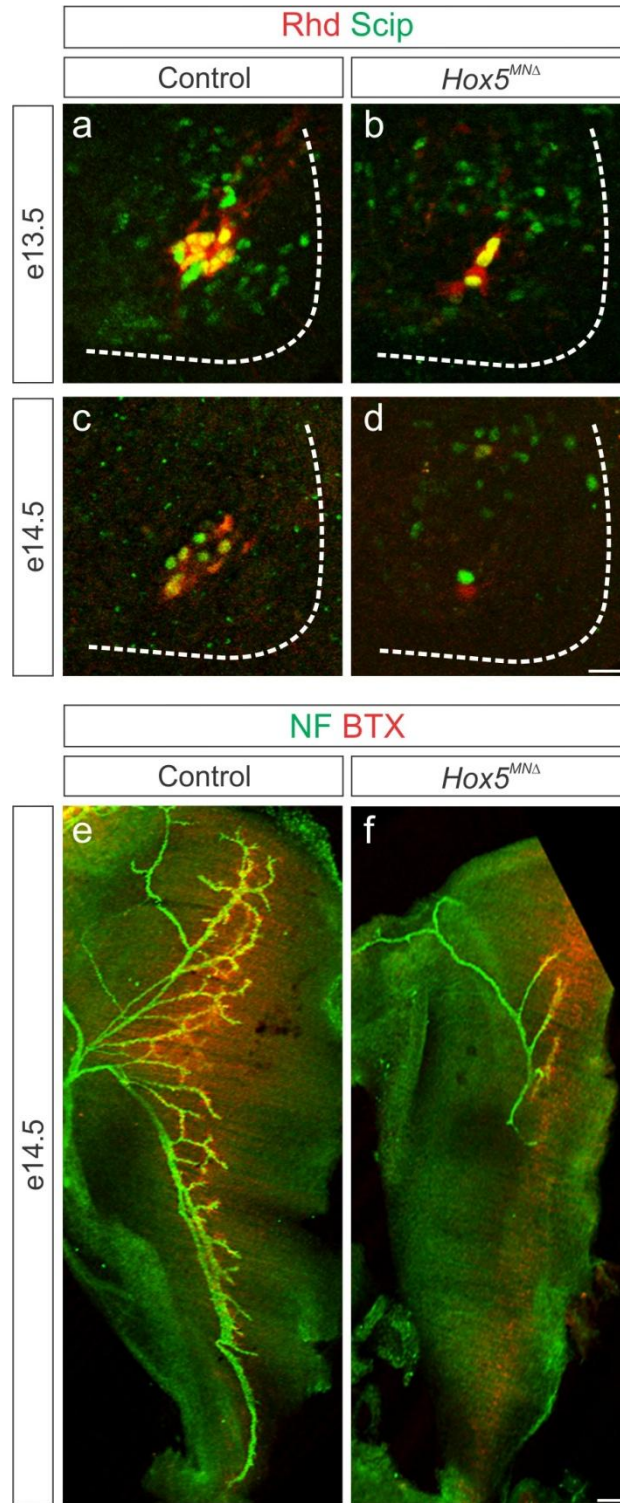

**Supplementary Figure 4. Innervation defects in *Hox5<sup>MNΔ</sup>* mice.**

(a-d) Reduction in RhD<sup>+</sup> cells after retrograde tracing of the phrenic nerve at e13.5 (a-b) and e14.5 (c-d) in *Hox5<sup>MNΔ</sup>* mice. Scale bar=25μm.

(e-f) Diaphragm innervation is reduced at e14.5 in *Hox5<sup>MNΔ</sup>* mice. Scale bar=100μm.

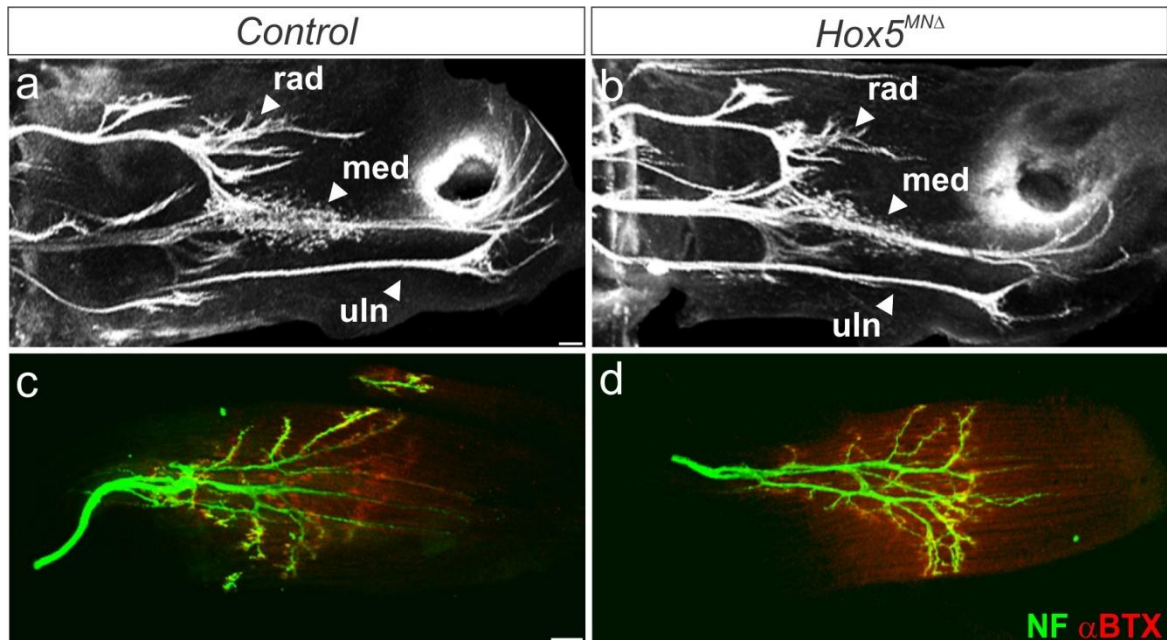

**Supplementary Figure 5. Normal forelimb and biceps muscle innervation in *Hox5*<sup>MNΔ</sup> mice.**  
 (a-b) Motor axons project to limb muscles normally in *Hox5*<sup>MNΔ</sup> mice. Images show pattern of e13.5 forelimb innervation in an *Hb9::GFP* background. Scale bar=100μm.  
 (c-d) The pattern of biceps muscle innervation is not altered in *Hox5*<sup>MNΔ</sup> mice at e18.5. Scale bar=100μm.

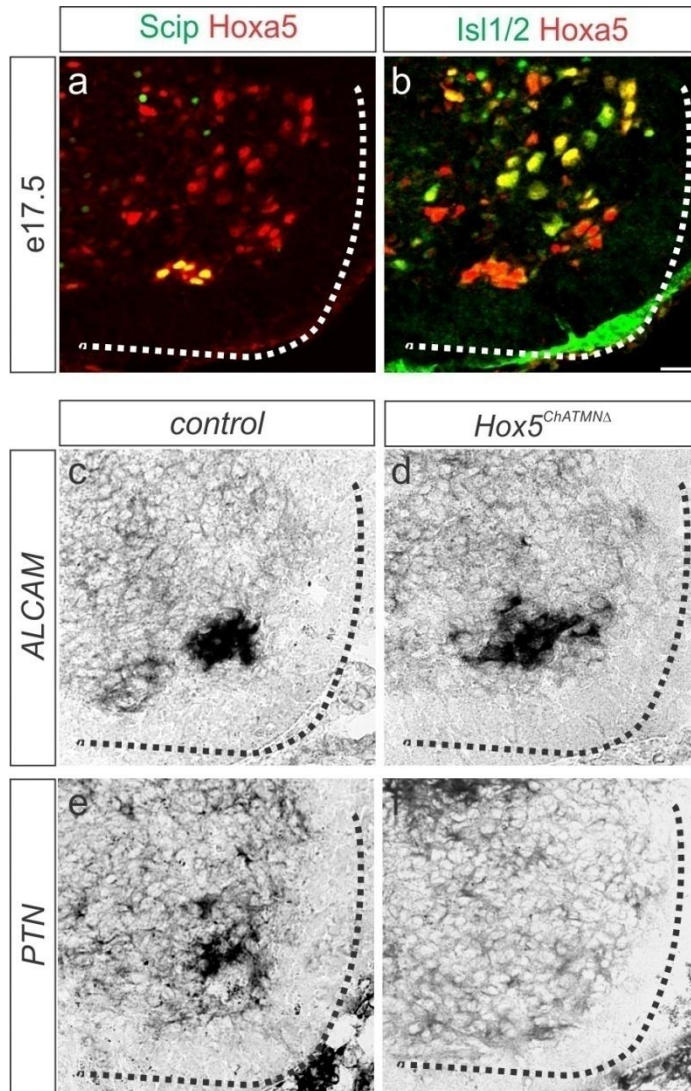

**Supplementary Figure 6. Hoxa5 expression persists at late embryonic stages.**

(a-b) PMC neurons continue to express Hoxa5 at least until e17.5, the latest embryonic stage examined.

(c-d) *ALCAM* expression is not affected in *Hox<sup>ChATMNA</sup>* mice at e14.5.

(e-f) *PTN* expression is reduced in *Hox<sup>ChATMNA</sup>* mice at e14.5.

Scale bar=25μm.

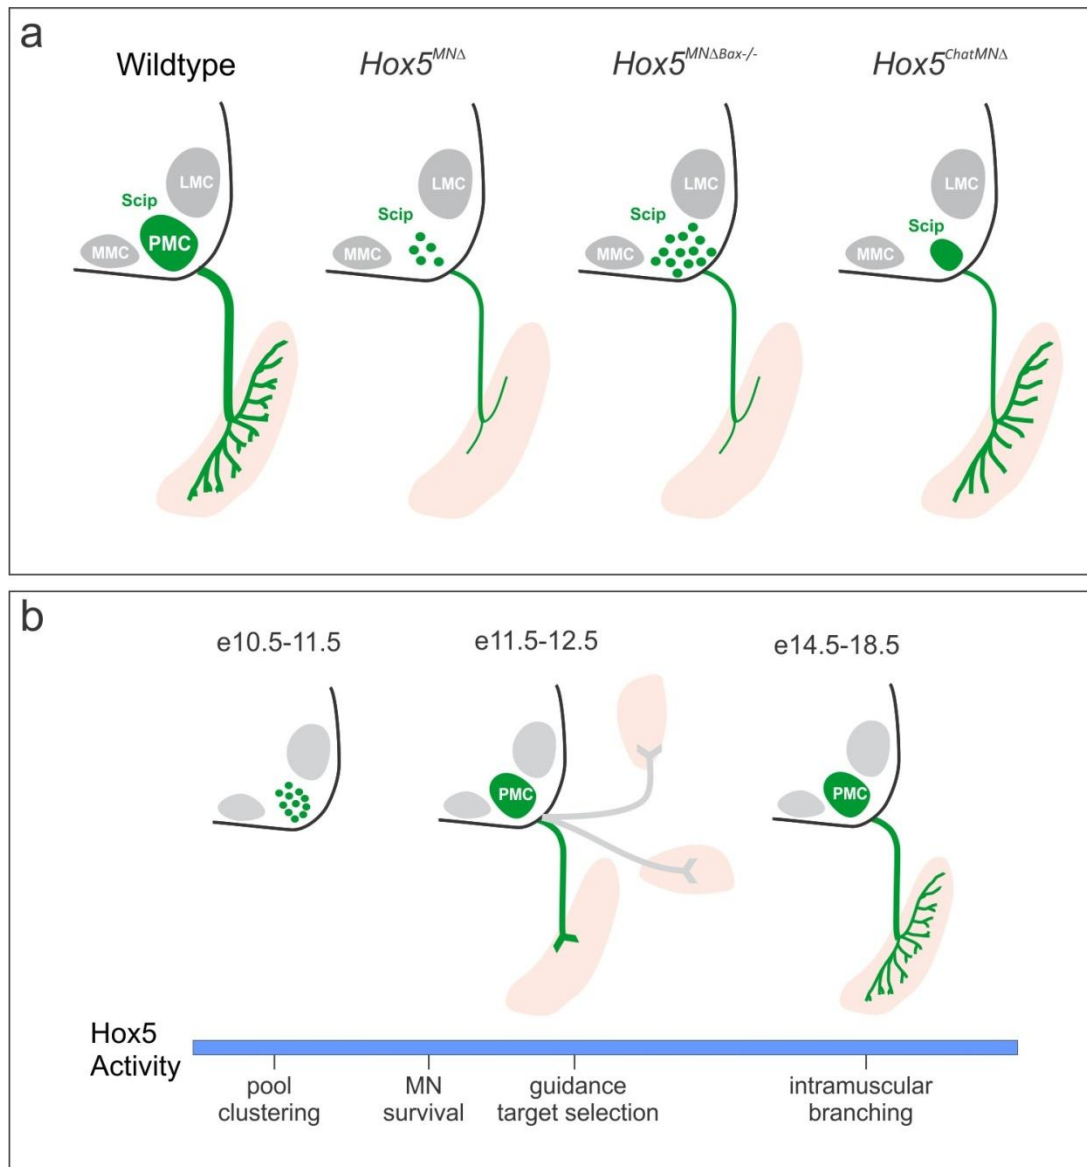

**Supplementary Figure 7. *Hox5* genes are essential for multiple facets of PMC differentiation.**

(a) Summary of the phenotypes observed with the different *Hox5* mutant strains. Removal of *Hox5* genes from motor neuron progenitors leads to cell death, PMC disorganization and severe diaphragm innervation defects. Rescue of cell death restores cell number but not cell body organization or innervation. Removal of *Hoxa5* from postmitotic motor neurons leads to PMC loss and branching defects, but preserves columnar organization. (b) *Hox5* genes define PMC identity by controlling facets of PMC development at specific temporal phases.



| Gene        | Ratio c/m | Accession number | Gene name                                                                         |
|-------------|-----------|------------------|-----------------------------------------------------------------------------------|
| COX7A2L     | 3.384665  | XM_123188.1      | cytochrome c oxidase subunit VIIa polypeptide 2-like                              |
| LYPD1/Lynx2 | 1.527575  | NM_145100.3      | Ly6/Plaur domain containing 1                                                     |
| MAML3       | 1.498015  | NM_001004176.1   | mastermind like 3                                                                 |
| MEGF9       | 1.48558   | NM_172694.2      | multiple EGF-like-domains 9                                                       |
| IMPACT      | 1.458044  | NM_008378.2      | imprinted and ancient                                                             |
| HOXC6       | 1.427784  | NM_010465.2      | homeobox C6                                                                       |
| UNCX        | 1.416359  | NM_013702.3      | UNC homeobox                                                                      |
| TAGAP1      | 1.413392  | NM_147155.2      | T cell activation GTPase activating protein 1                                     |
| HMG2        | 1.402983  | NM_016957.3      | high mobility group nucleosomal binding domain 2                                  |
| GADD45A     | 1.394091  | NM_007836.1      | growth arrest and DNA-damage-inducible 45 alpha                                   |
| TBC1D20     | 1.370696  | NM_024196.3      | TBC1 domain family, member 20                                                     |
| MRPS35      | 1.369718  | NM_145573.2      | mitochondrial ribosomal protein S35                                               |
| PAQR9       | 1.369276  | NM_198414.2      | progesterin and adipoQ receptor family member IX                                  |
| RABL4       | 1.361176  | NM_025931.2      | intraflagellar transport 27                                                       |
| CXX1A       | 1.351944  | NM_024170.1      | CAAX box 1 homolog A                                                              |
| CITED2      | 1.335656  | NM_010828.2      | Cbp/p300-interacting transactivator, with Glu/Asp-rich carboxy-terminal domain, 2 |
| HOXA5       | 1.335396  | NM_010453.2      | homeobox A5                                                                       |
| EXOSC2      | 1.333737  | NM_144886.1      | exosome component 2                                                               |
| RCCD1       | 1.332452  | NM_173445.1      | RCC1 domain containing 1                                                          |
| TMEM90A     | 1.33012   | NM_001033334.1   | transmembrane protein 90a                                                         |
| LLPH        | 1.319654  | NM_025431.2      | long-term synaptic facilitation homolog                                           |
| RTN4        | 1.312443  | NM_194054.1      | reticulon 4                                                                       |
| NAP1L5      | 1.307726  | NM_021432.2      | nucleosome assembly protein 1-like 5                                              |
| ZFP131      | 1.301916  | NM_028245.1      | zinc finger protein 131                                                           |
| TNFSF13B    | 1.293779  | NM_033622.1      | tumor necrosis factor (ligand) superfamily, member 13b                            |
| DDX20       | 1.292543  | NM_017397.2      | DEAD (Asp-Glu-Ala-Asp) box polypeptide 20                                         |
| MBTD1       | 1.285682  | NM_134012.2      | mbt domain containing 1                                                           |
| TLE3        | 1.284471  | NM_001083928.1   | transducin-like enhancer of split 3                                               |
| TAF1A       | 1.27814   | NM_021466.1      | TATA box binding protein (Tbp)-associated factor, RNA polymerase I, A             |
| CDK5RAP1    | 1.275018  | NM_025876.2      | CDK5 regulatory subunit associated protein 1                                      |
| KLC1        | 1.274117  | NM_001025360.2   | kinesin light chain 1                                                             |
| CEP78       | 1.262065  | NM_198019.2      | centrosomal protein 78                                                            |

**Supplementary Table 1. List of genes found to be downregulated in cervical motor neurons of *Hox5<sup>MNA</sup>* embryos at e12.5.** Genes were included on this list if the change in expression was >1.25 and showed a p-value of <0.1. The ratio of expression between control/mutant embryos (c/m) is indicated in Column 2. Expression of these genes was subsequently analyzed by quantitative PCR and in situ hybridization.
